# Supplementary material for: Present-day correlations insufficient to constrain cloud albedo change by anthropogenic aerosols in E3SM v2
Source: Copernicus journal article supplement (doi:10.5194/egusphere-2024-366), 2024-02-09

## Description

## Figure 2

Wrong  
(current)

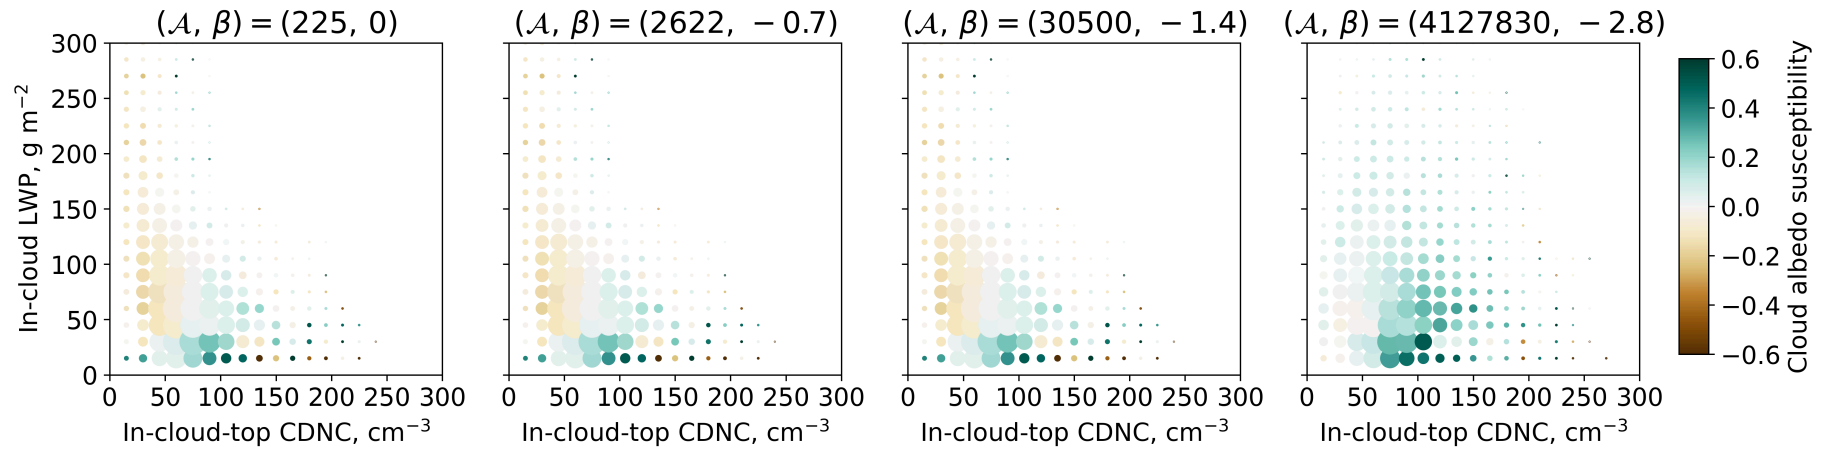

Fixed  
(revised)

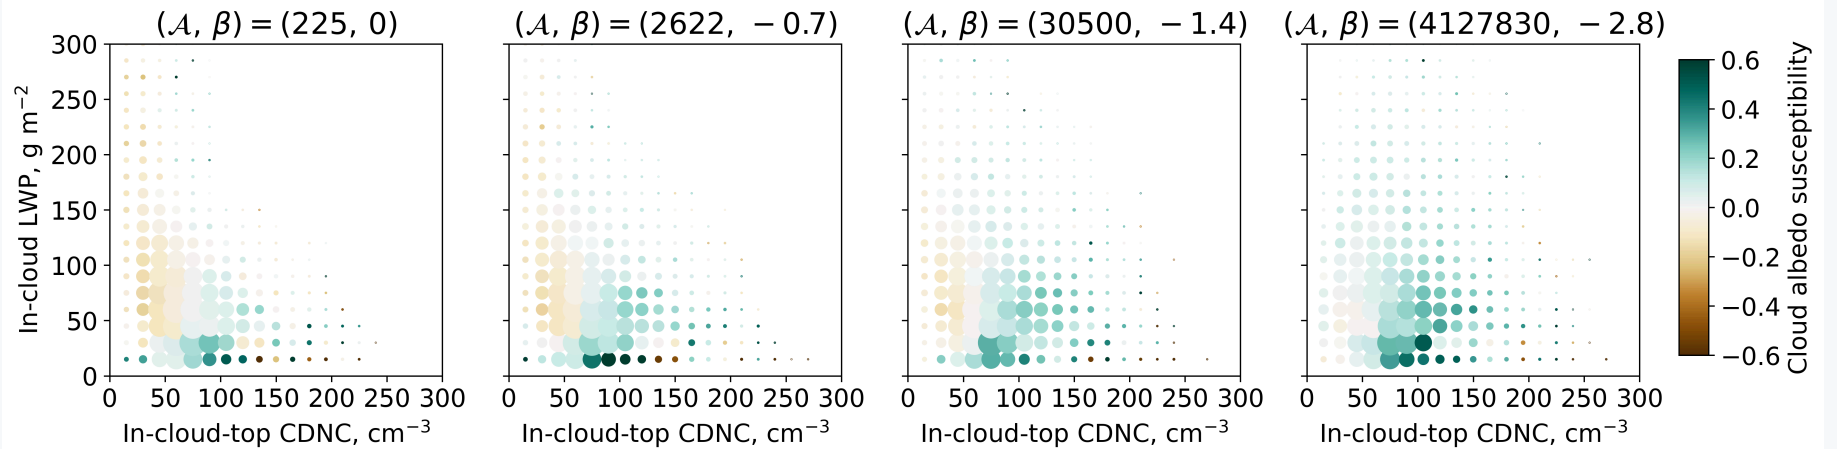

Supplement: Supplementary file [file egusphere-2024-366-AC1-supplement.pdf]
